# Supplementary material for: A cross-sectional study of the associations between the traditional Japanese diet and nutrient intakes: the NILS-LSA project
Source: Springer Nature journal article supplement (doi:10.1186/s12937-019-0468-9), 2019-07-30

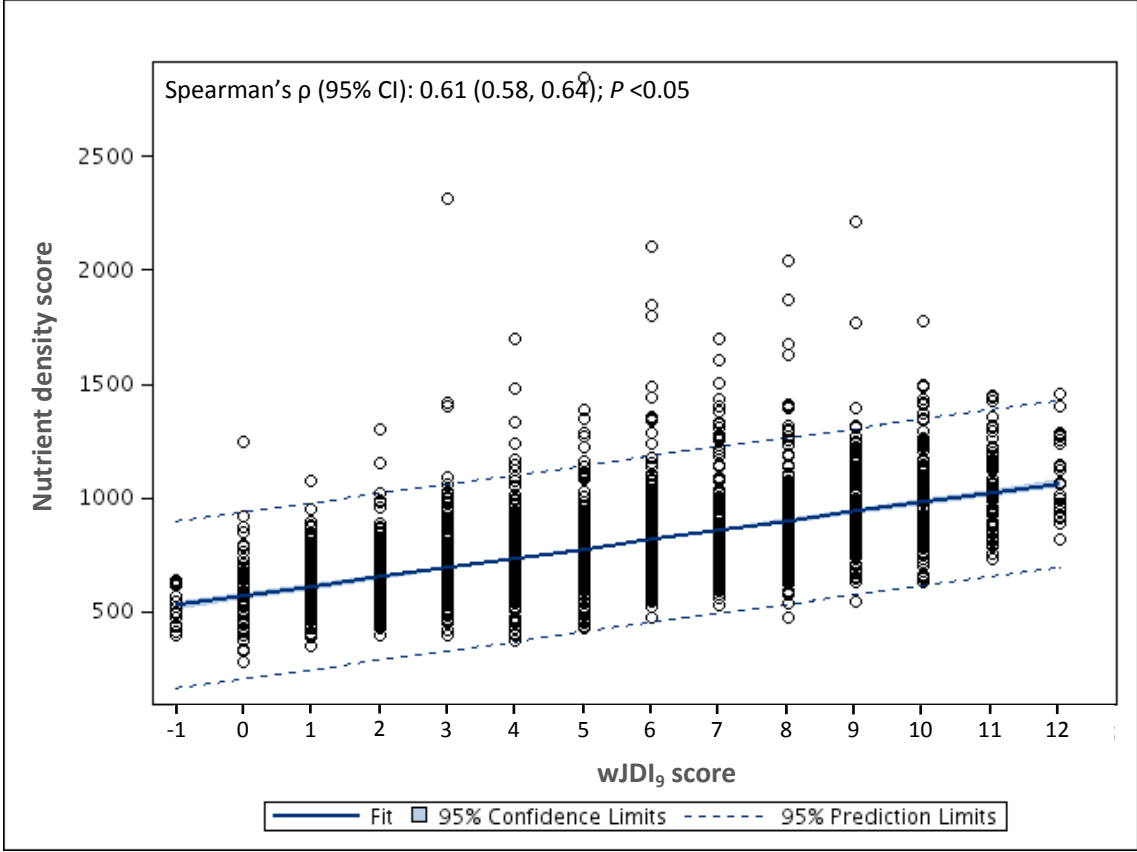

Supplement: MOESM2 [file 25659464]
